# Supplementary material for: Photocatalytic oxidation of arylalcohols to aromatic aldehydes promoted by hydroxyl radicals over a CoP/CdS photocatalyst in water with hydrogen evolution
Source: Royal Society of Chemistry journal article supplement (doi:10.1039/c8cy00138c), 2018-01-01
Supplement: c8cy00138c1.pdf [file c8cy00138c1.pdf]

**Electronic Supplementary Information**

**Photocatalytic oxidation of arylalcohols to aromatic aldehydes  
promoted by hydroxyl radicals over CoP/CdS photocatalyst in water  
with hydrogen evolution**

Yong Xu,<sup>a,b</sup> Ling-Zhen Zeng,<sup>c</sup> Zhi-Chang Fu,<sup>a</sup> Cong Li,<sup>c</sup> Zhi Yang,<sup>c</sup> Yong Chen<sup>a</sup>  
and Wen-Fu Fu<sup>\*a,c</sup>

*<sup>a</sup>Key Laboratory of Photochemical Conversion and Optoelectronic Materials and  
HKU-CAS Joint Laboratory on New Materials, Technical Institute of Physics and  
Chemistry, Chinese Academy of Sciences, Beijing 100190, P.R. China*

E-mail: [fuwf@mail.ipc.ac.cn](mailto:fuwf@mail.ipc.ac.cn)

*<sup>b</sup>University of Chinese Academy of Sciences, Chinese Academy of Sciences, Beijing 100190,  
P.R. China*

*<sup>c</sup>College of Chemistry and Chemical Engineering, Yunnan Normal University, Kunming  
650092, P.R. China*

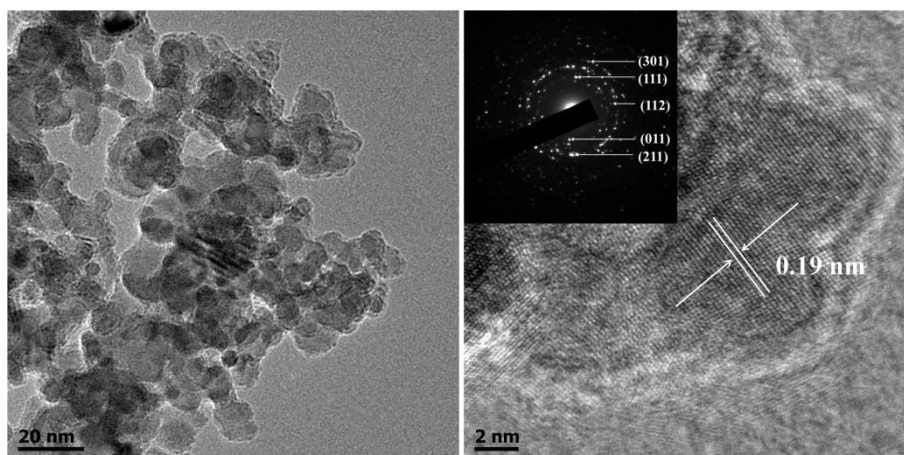

**Fig. S1** TEM and HRTEM images, SAED (selected area electron diffraction) pattern (inset) of prepared CoP nanoparticles.

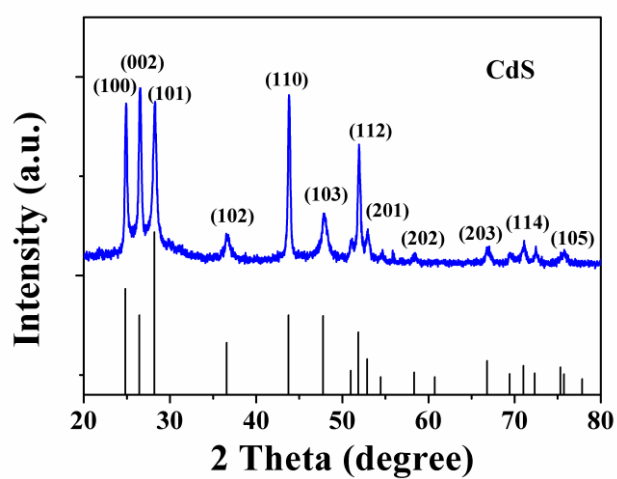

**Fig. S2** XRD pattern of prepared CdS.

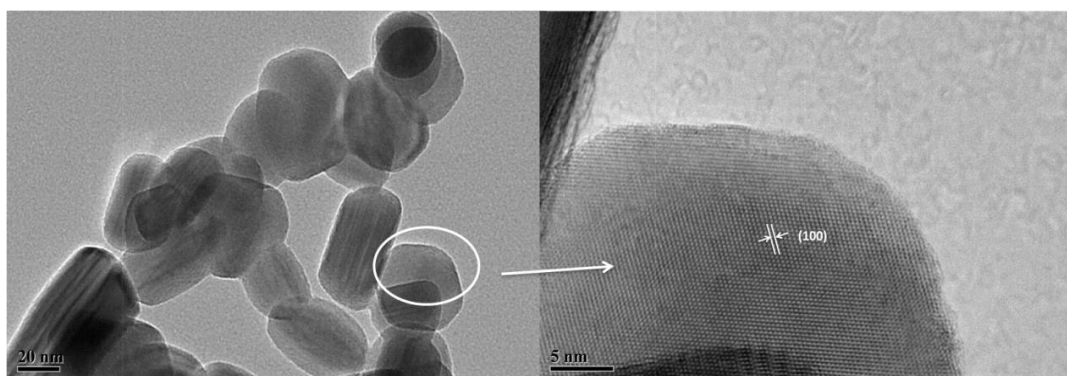

**Fig. S3** TEM and HRTEM image of CdS.

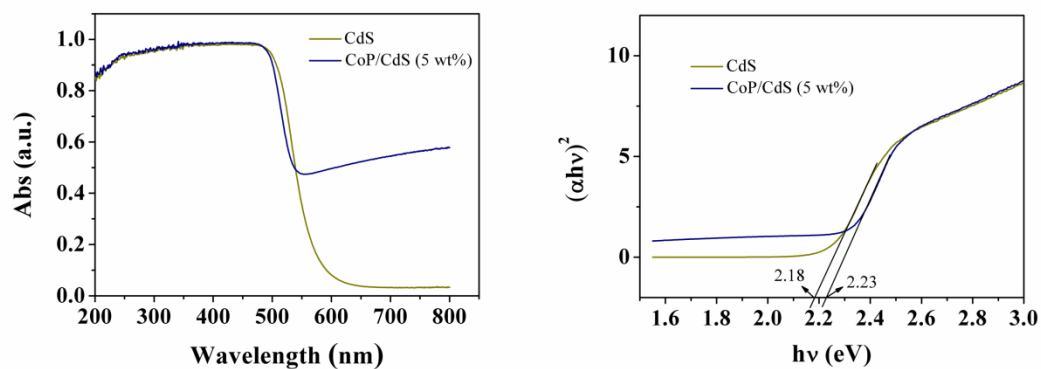

**Fig. S4** UV-vis DRS of CdS and CoP/CdS, and corresponding plots of  $(\alpha h\nu)^2$  vs. Energy ( $h\nu$ ) for the band gap energy.

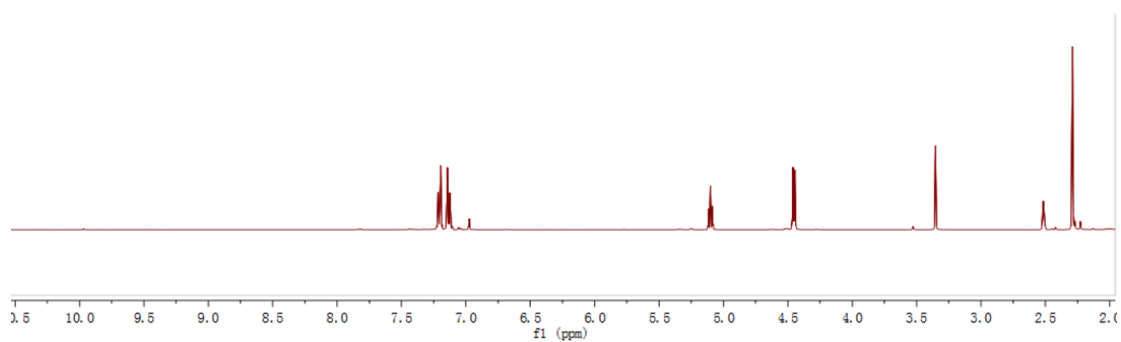

**Fig. S5**  $^1\text{H}$  NMR of photocatalytic reaction for 4-methylbenzyl alcohol by using acetonitrile as solvent.

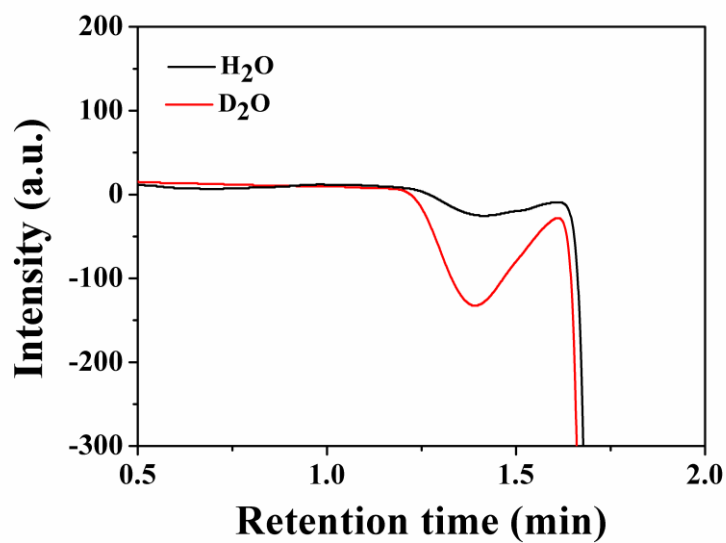

**Fig. S6** GC signals obtained with He as carrier gas.

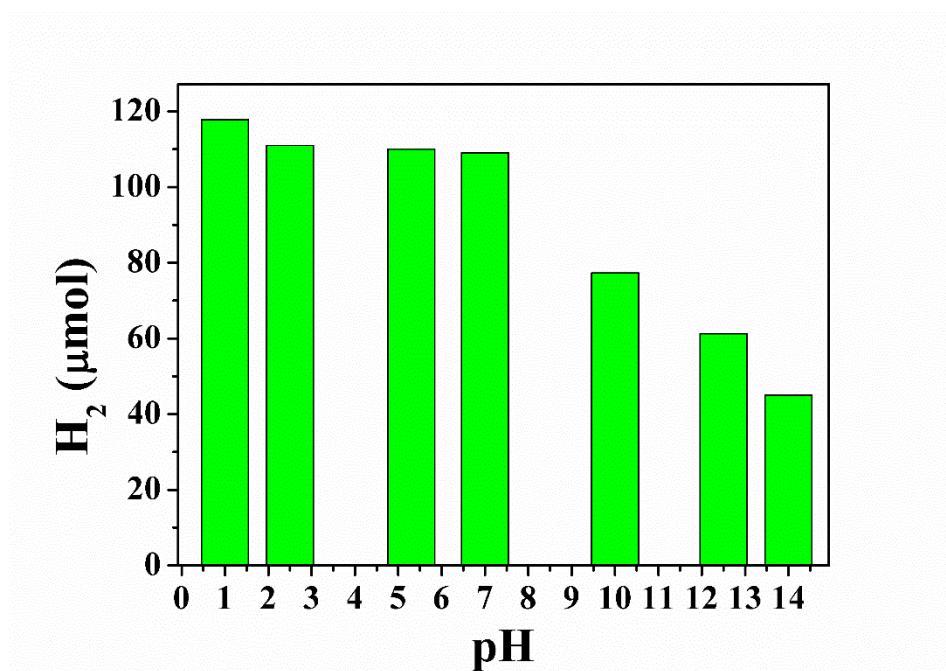

**Fig. S7** The impact of pH on photocatalytic activity of hydrogen production.

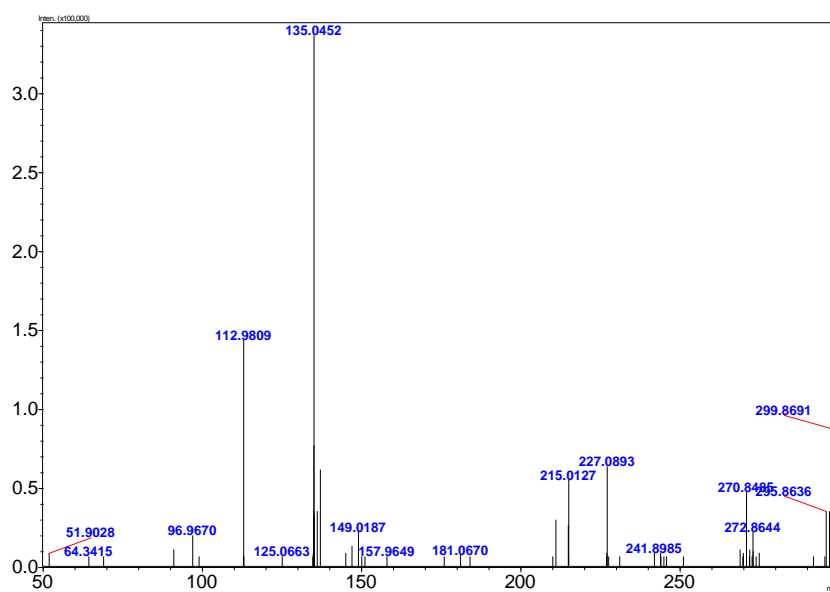

**Fig. S8** Mass spectra of 4-methylbenzoic acid after 15 h irradiation.

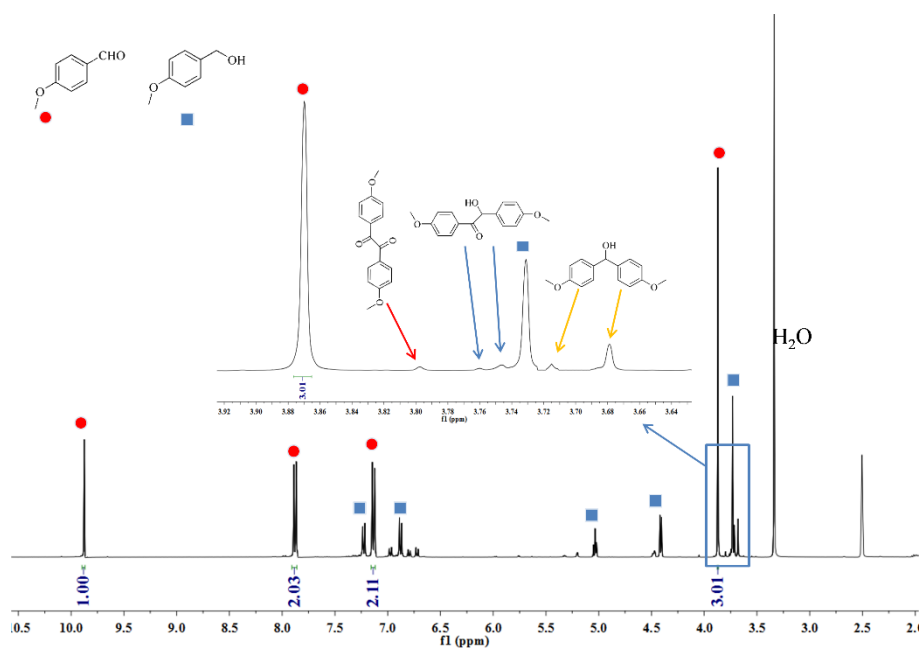

**Fig. S9**  $^1\text{H}$  NMR spectrum of 4-methoxybenzyl alcohol after visible-light catalysis for 5 h at room temperature.

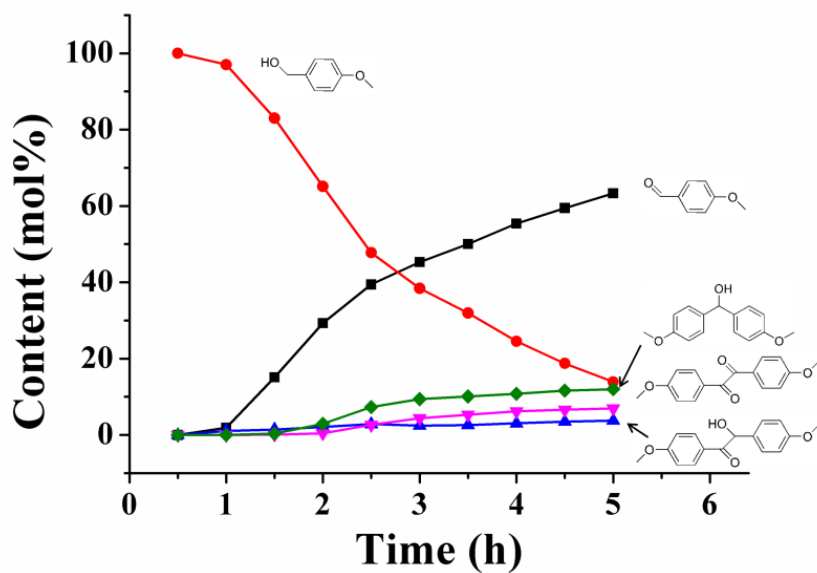

**Fig. S10** The content of chemicals in the process of photocatalytic reaction. Reaction conditions: 2.5 mg catalyst, 5 mL of water, 4-methoxybenzyl alcohol (0.1 mmol), visible light irradiation for 5 h, at room temperature.

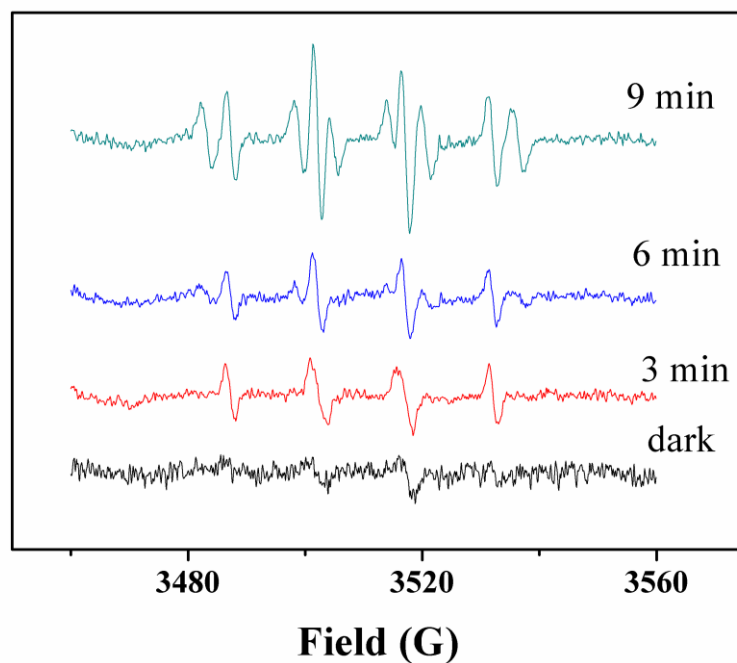

**Fig. S11** Time-depended ESR experiment. Reaction conditions: 2.5 mg CoP/CdS (5 wt%), 5 mL water, 4-methylbenzyl alcohol (0.1 mmol), at room temperature.

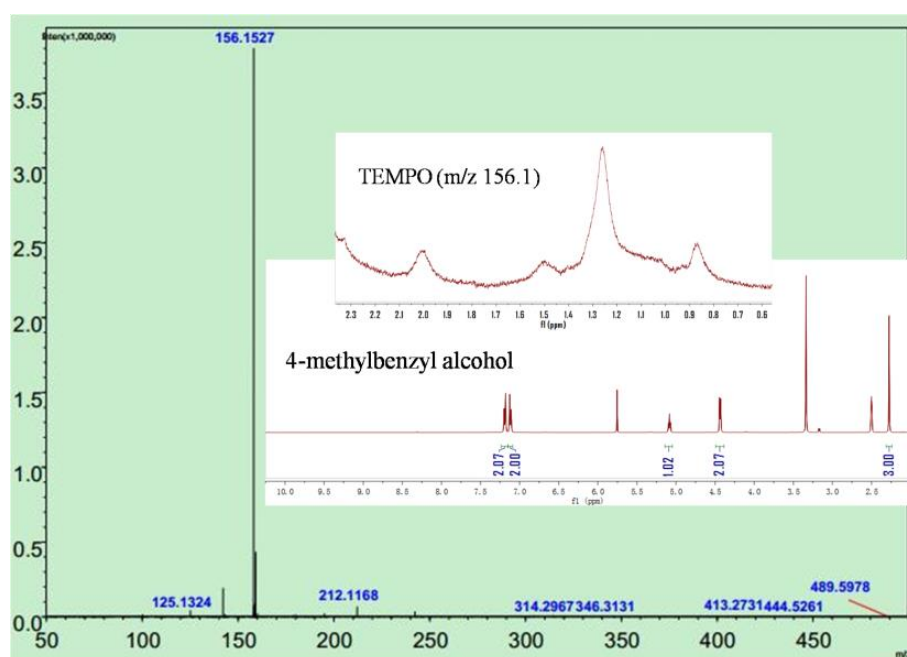

**Fig. S12** The results of <sup>1</sup>H NMR and mass spectra by adding TEMPO as free radical quencher in photocatalytic system. Reaction conditions: 2.5 mg catalyst, 5 mL of water, 4-methylbenzyl alcohol (0.1 mmol), TEMPO (0.1 mmol), visible light irradiation for 5 h, at room temperature.

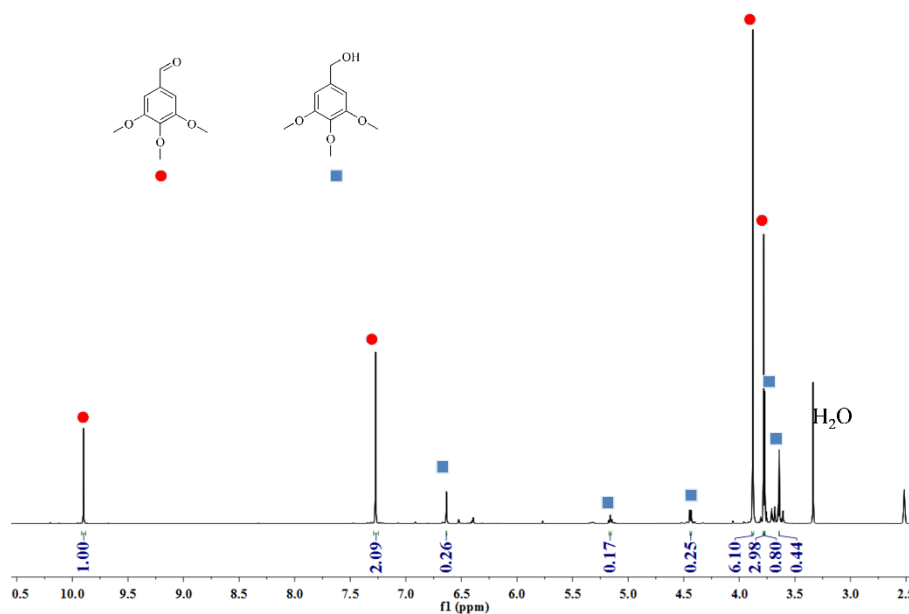

**Fig. S13** <sup>1</sup>H NMR spectrum of catalytic oxidation of substrate for entry 2 in Table 1.

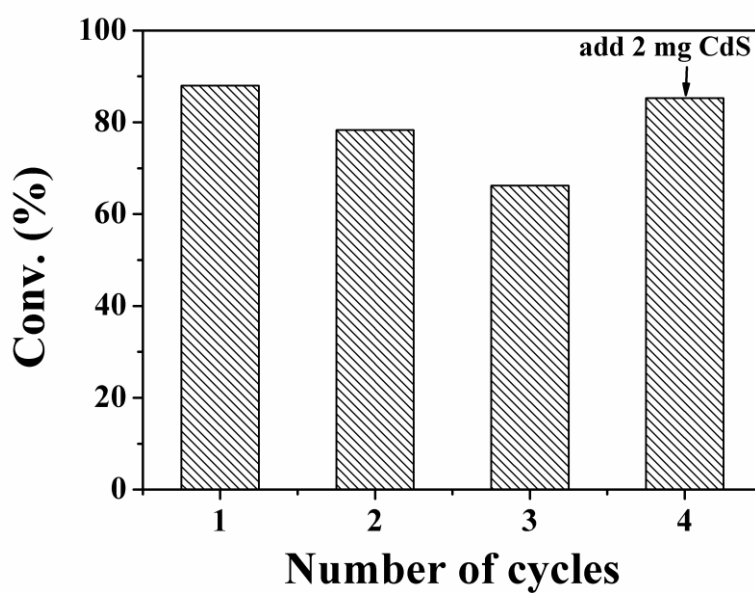

**Fig.S14** Cycle experiment of CoP/CdS (5 wt%). Reaction conditions: 2.5 mg catalyst, 5 mL of water, 4-methylbenzyl alcohol (0.1 mmol), visible light irradiation for 5 h, at room temperature.

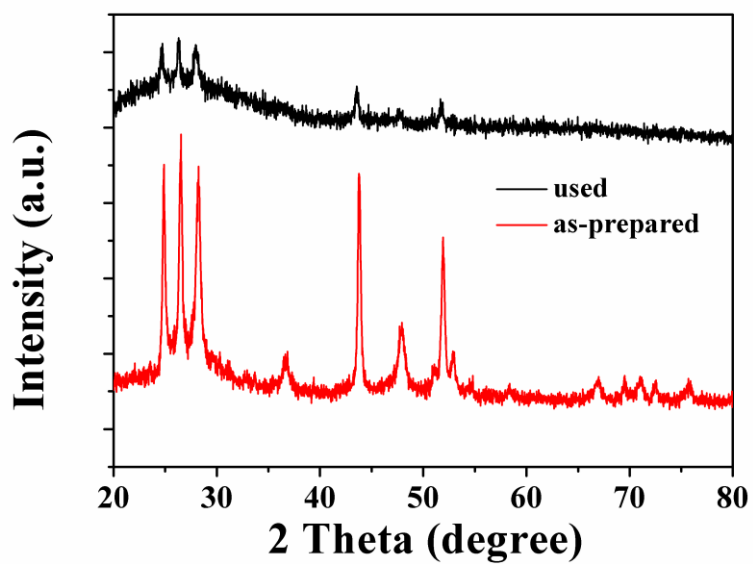

**Fig. S15** XRD patterns of prepared and used CoP/CdS (5 wt%).

**Table S1** Results of quenching experiment.

| Entry | Quenching agent    | Quenching group | Conv. (%) | Sel. (%) |
|-------|--------------------|-----------------|-----------|----------|
| 1     | —                  | —               | 88.0      | 75.8     |
| 2     | EDTA-2Na           | hole            | 20.3      | 99.1     |
| 3     | tert-butyl alcohol | •OH             | 3.2       | 99.9     |

Reaction conditions: 2.5 mg catalyst, 5 mL water, 4-methylbenzyl alcohol (0.1 mmol), quenching agent(0.1 mmol), visible light irradiation for 5 h, at room temperature.
